# Supplementary material for: A laser-induced graphene-based flexible and all-carbon organic electrochemical transistor
Source: Royal Society of Chemistry journal article supplement (doi:10.1039/d3tc00342f), 2023-01-01
Supplement: d3tc00342f1.pdf [file d3tc00342f1.pdf]

## Supporting Information

### Laser-induced graphene-based flexible and all-carbon organic electrochemical transistor

Guozhang Ren,<sup>1</sup> Hua Fan,<sup>1</sup> Linrong Zhang,<sup>1</sup> Shunhao He,<sup>1</sup> Chengcheng Zhu,<sup>1</sup> Kun  
Gao,<sup>1</sup> Yulong Zhang,<sup>1</sup> Junjie Wang,<sup>1</sup> Xing Kang,<sup>1</sup> Yaxin Song,<sup>1</sup> Zhongyan Gong,<sup>1</sup>  
Gongqiang Li,<sup>1</sup> Gang Lu,<sup>1\*</sup> Hai-Dong Yu<sup>1,2\*</sup>

<sup>1</sup>School of Flexible Electronics (Future Technologies), Institute of Advanced Materials, and Key Laboratory of Flexible Electronics, Nanjing Tech University, 30 South Puzhu Road, Nanjing 211816, PR China.

<sup>2</sup>Frontiers Science Center for Flexible Electronics, Xi'an Institute of Flexible Electronics, and Xi'an Institute of Biomedical Materials & Engineering, Northwestern Polytechnical University, 127 West Youyi Road, Xi'an 710072, PR China.

Corresponding authors: Gang Lu, [ianglv@njtech.edu.cn](mailto:ianglv@njtech.edu.cn); Hai-Dong Yu, [iamhdyu@nwpu.edu.cn](mailto:iamhdyu@nwpu.edu.cn)

## Supplementary Figures

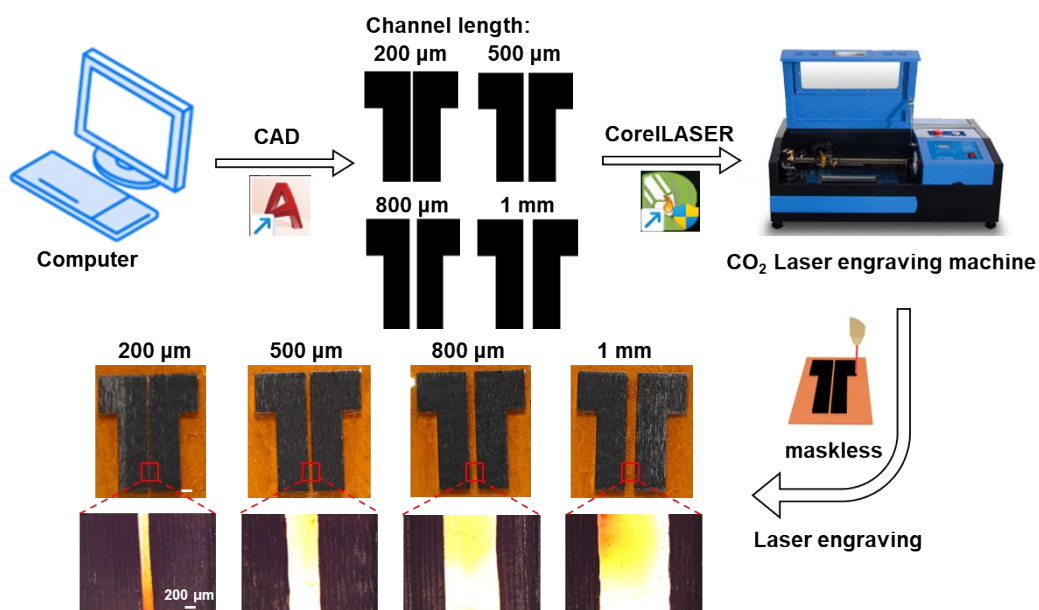

**Fig. S1.** Methods for preparing LIG electrodes with different channel lengths.

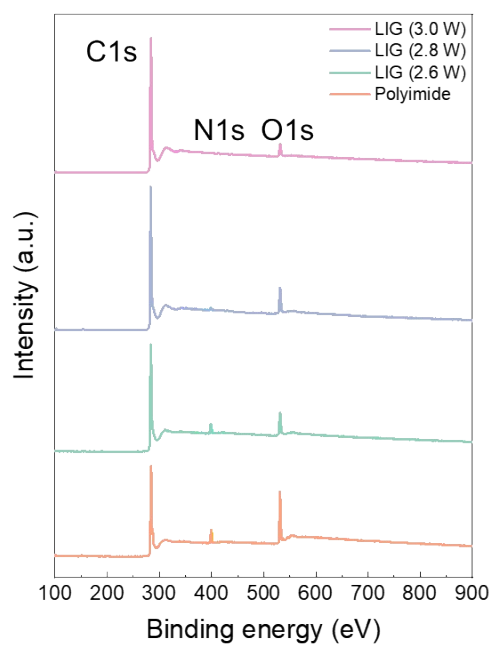

**Fig. S2.** XPS survey spectra of polyimide and the LIG electrodes prepared at different laser powers.

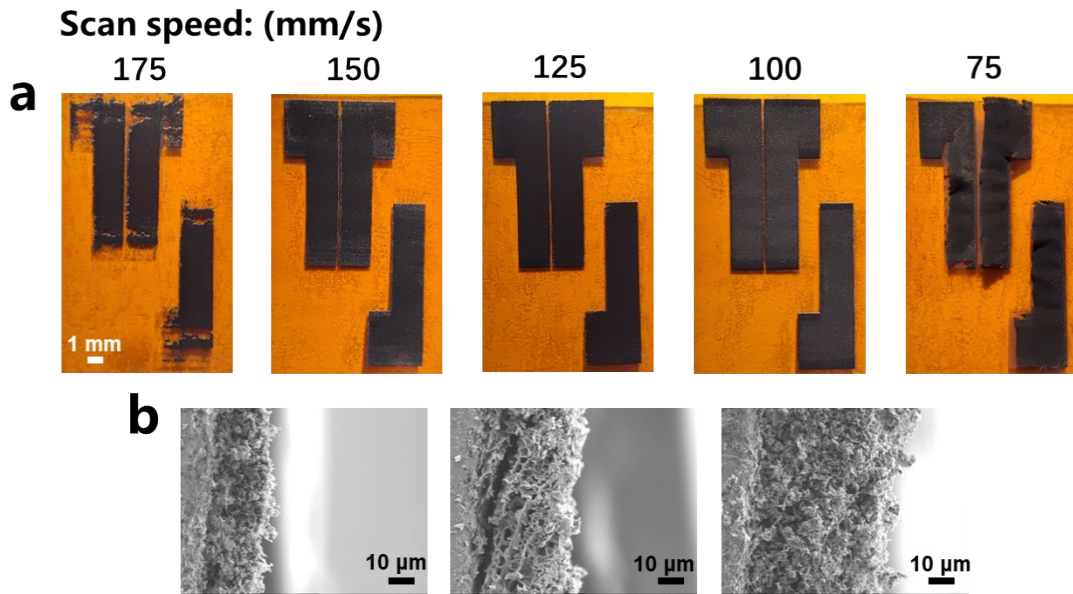

**Fig. S3.** (a) Photographs of the LIG electrodes prepared at the laser scanning speeds ranging from 75 to 175  $\text{mm s}^{-1}$ . (b). SEM cross-sectional images of the LIG electrodes prepared at the laser scanning speeds of 150, 125, and 100  $\text{mm s}^{-1}$ .

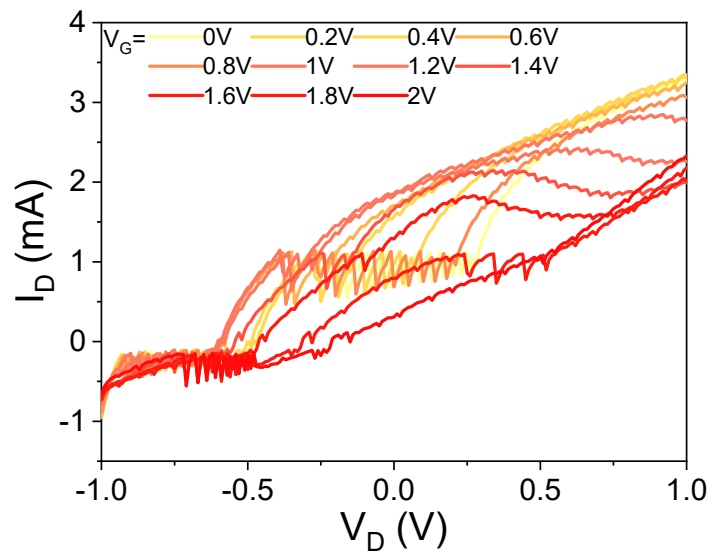

**Fig. S4.** Output curves of the LIG-OECT based on pristine PEDOT:PSS.

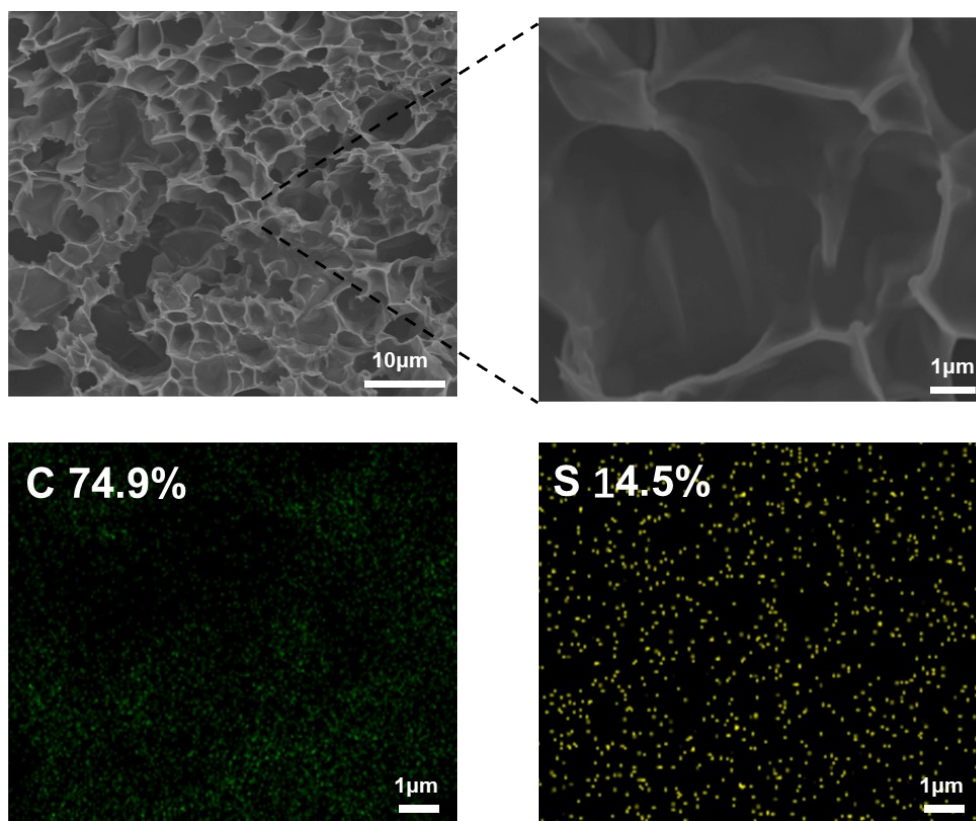

**Fig. S5.** SEM images and EDS mapping of the PEDOT:PSS coated on LIG surface.

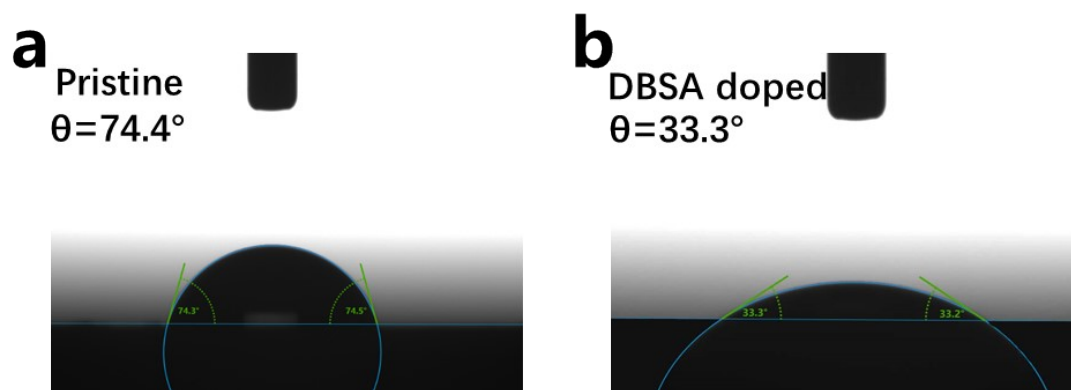

**Fig. S6.** Water contact angles on the surfaces of (a) pristine and (b) DBSA doped PEDOT:PSS films.

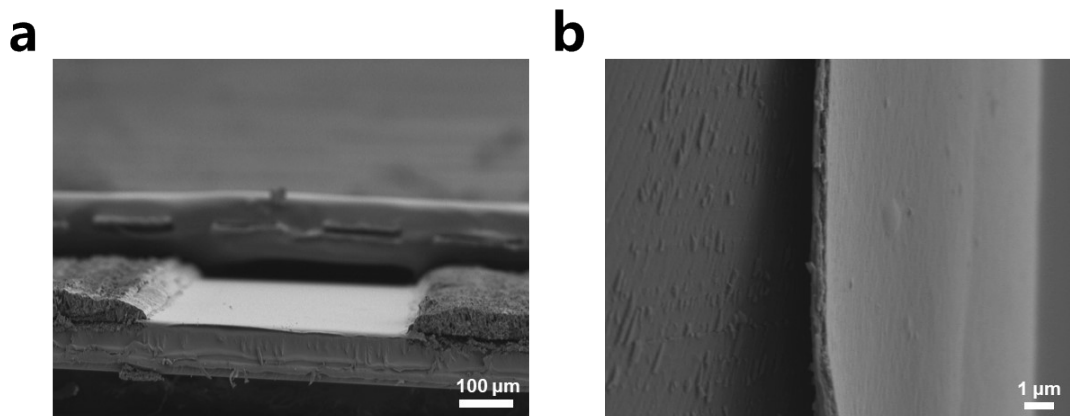

**Fig. S7.** SEM images of the cross-section of (a) channel LIG-OECT, and (b) PEDOT:PSS layer.

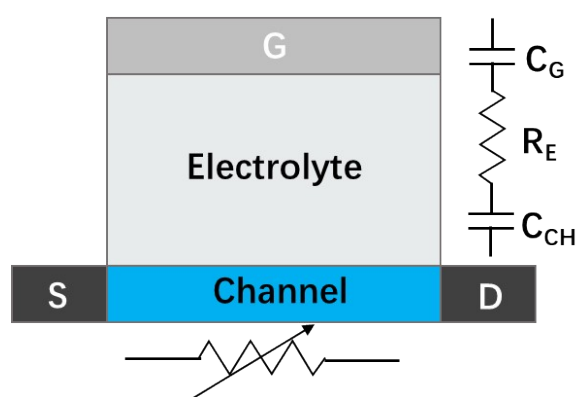

**Fig. S8.** Equivalent circuit model of OECT.

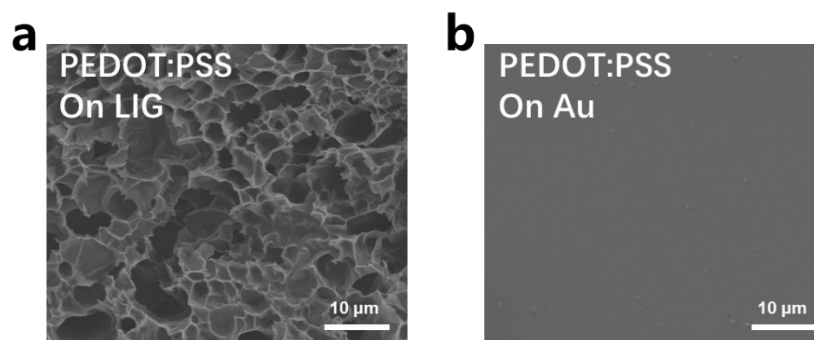

**Fig. S9.** SEM images of the PEDOT:PSS films on (a) LIG and (b) Au electrodes.

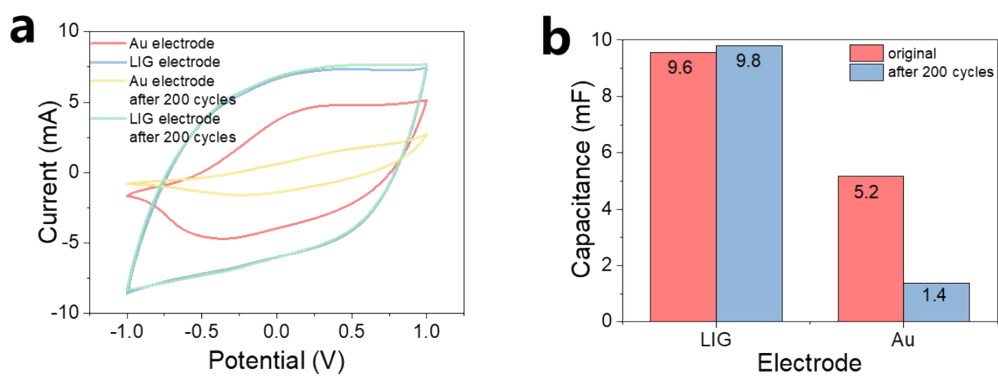

**Fig. S10.** Capacitance change of the PEDOT:PSS layers on LIG and Au electrodes (a) before and (b) after 200 cycles of CV tests.

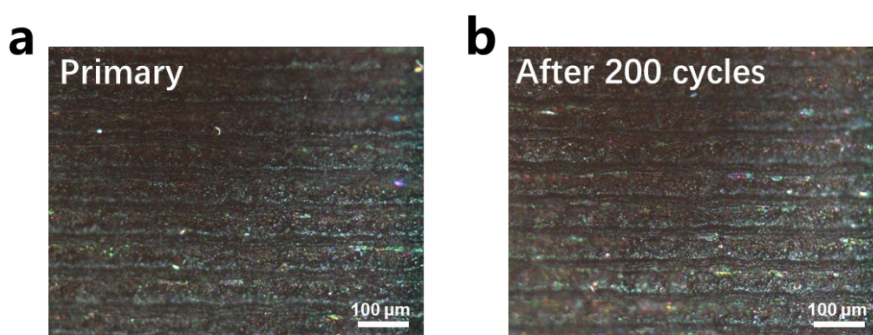

**Fig. S11.** Optical microscopic images of the PEDOT:PSS layer on LIG electrode (a) before and (b) after 200 cycles of CV tests.

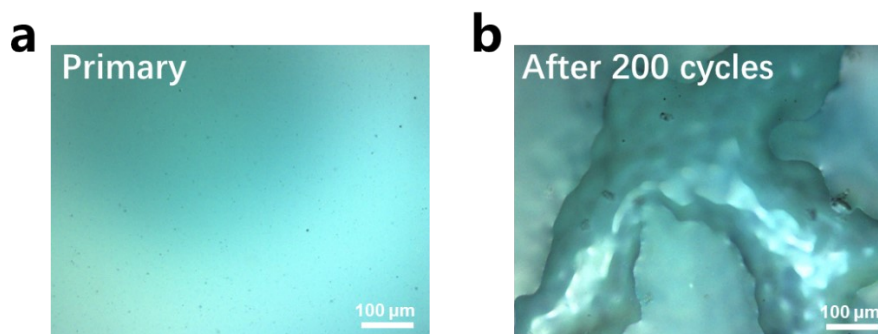

**Fig. S12.** Optical microscopic images of the PEDOT:PSS layers on Au electrodes (a) before and (b) after 200 cycles of CV tests.

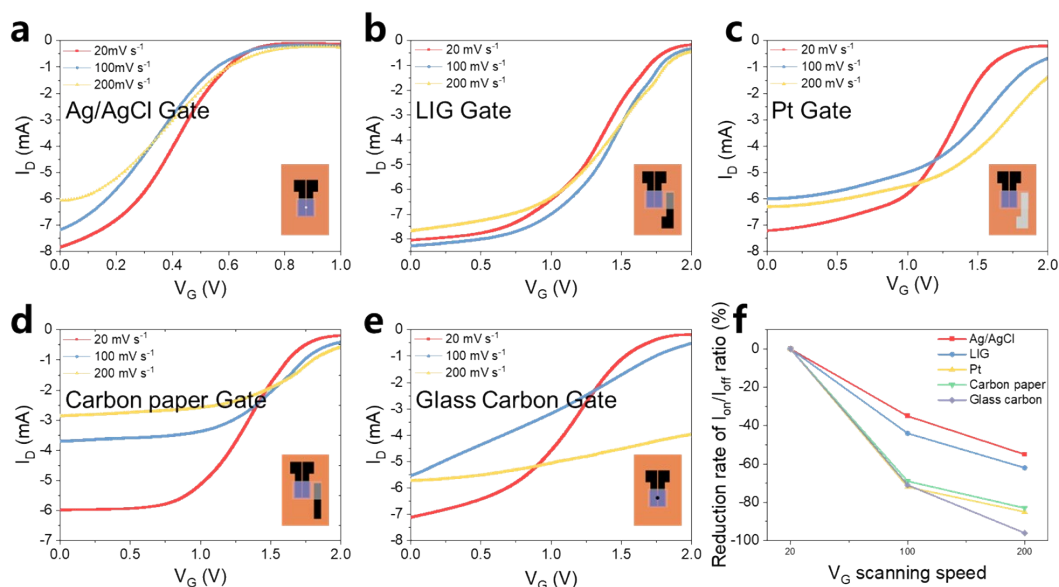

**Fig. S13.** Transfer curves of LIG-OECT at different gates: (a) Ag/AgCl. (b) LIG. (c) Pt. (d) Carbon paper. (e) Glassy carbon. **f.** The  $I_{\text{on}}/I_{\text{off}}$  ratio decreases with the increase of gate voltage scanning speed

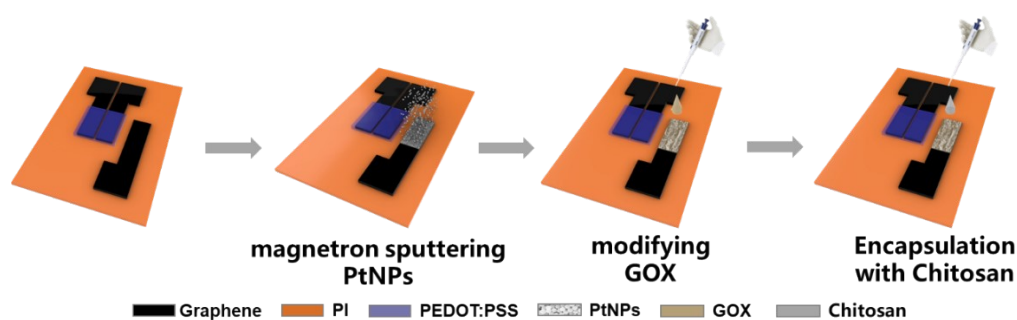

**Fig. S14.** Schematic diagram of the preparation procedure of the LIG-OECT glucose sensor.

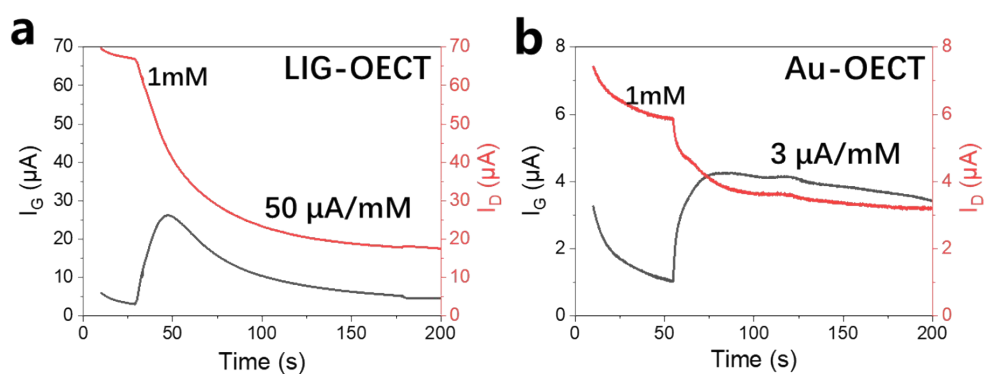

**Fig. S15.** Response curves of the  $I_D$  and  $I_G$  of the (a) LIG-OECT and (b) Au-OECT to 1 mM glucose solution.

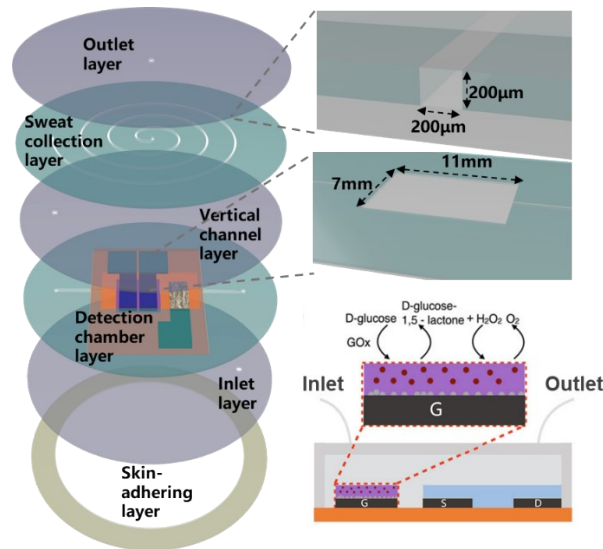

**Fig. S16.** Schematic diagram of the structure and construction of the microfluidic chip based on LIG-OECT for glucose sensing.

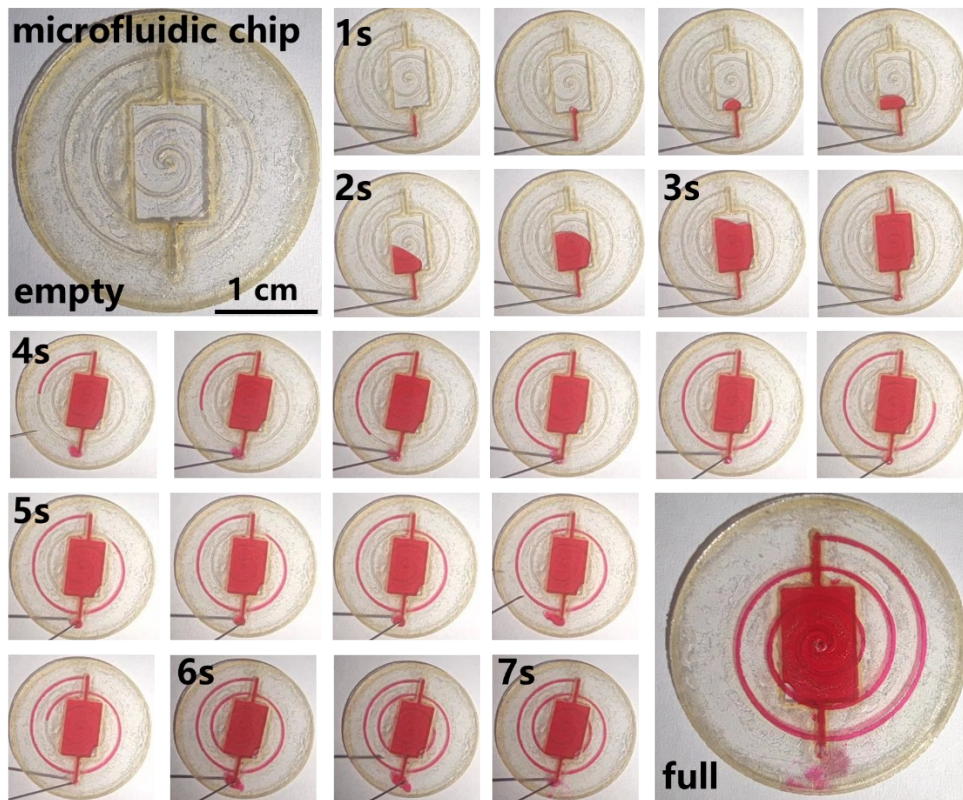

**Fig. S17.** Photographs showing the flow of red ink in our microfluidic chip.



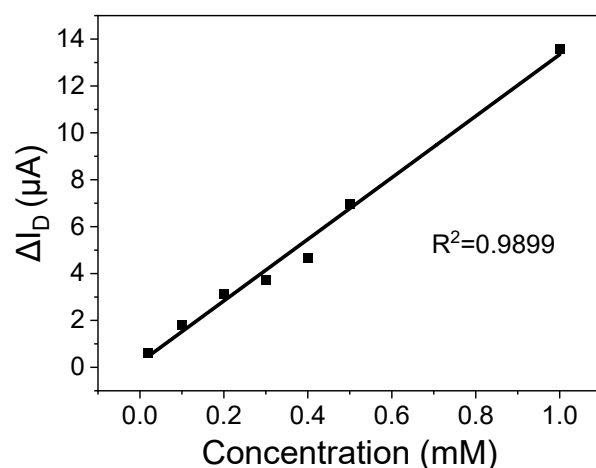

**Fig. S18.** Linearity of the detection of artificial sweat by the LIG-OECT.

## Supplementary Table

**Table S1.** Performance comparison of glucose detection devices based on OECT.

| Channel                     | Gate electrode             | Electrolyte       | Detection response time | Detection limit | Ref.      |
|-----------------------------|----------------------------|-------------------|-------------------------|-----------------|-----------|
| PEDOT:PSS                   | Pt/Gox                     | PBS               | 10 s                    | 100 $\mu M$     | 1         |
| PEDOT:PSS                   | Pt/Gox/Nafion              | PBS               | $\approx 20$ s          | 100 $\mu M$     | 2         |
| PEDOT:PSS                   | Au/LDH/Gox                 | PBS               | 50 s                    | 20 $\mu M$      | 3         |
| PEDOT:PSS                   | Carbon                     | PBS/Gox           | 15 s                    | 1 $\mu M$       | 4         |
| PEDOT:PSS/DB SA/EG          | Pt                         | PBS/Gox           | -                       | 1 $\mu M$       | 5         |
| PEDOT:PSS/D MSO             | Graphene                   | PBS/Gox/Ferrocene | $\approx 70$ s          | 100 nM          | 6         |
| PEDOT:PSS/RT IL/Gox         | PEDOT:PSS/RT IL/Gox        | PBS               | <60 s                   | 100 nM          | 7         |
| PEDOT:PSS/EG                | Au/Gox/Chitosan            | PBS               | 15 s                    | 100 nM          | 8         |
| PEDOT:PSS                   | CHIT/Graphene/Gox/Chitosan | PBS               | $\approx 80$ s          | 10 nM           | 9         |
| PEDOT:PSS/Au NPs            | Pt/Gox/Nafion              | 0.1 M NaCl        | 10 s                    | 10 nM           | 10        |
| PEDOT:PSS/[EMIM][PF6]/D BSA | Pt/Gox/Nafion              | 0.1 M NaCl        | 10 s                    | 10 nM           | 11        |
| PEDOT:PSS/DB SA             | LIG/PtNPs/Gox/Chitosan     | 0.1 M NaCl        | <5 s                    | 10 nM           | This work |
| PEDOT:PSS                   | MWCNT-CHIT/PtNPs/Gox       | PBS               | $\approx 50$ s          | 5 nM            | 12        |

## References

1. Z.-T. Zhu, J. T. Mabeck, C. Zhu, N. C. Cady, C. A. Batt and G. G. Malliaras, *Chem. Commun.*, 2004, **40**, 1556-1557.
2. A. Ait Yazza, P. Blondeau and F. J. Andrade, *ACS Appl. Electron. Mater.*, 2021, **3**, 1886-1895.
3. I. Gualandi, M. Tessarolo, F. Mariani, D. Arcangeli, L. Possanzini, D. Tonelli, B. Fraboni and E. Scavetta, *Sensors*, 2020, **20**, 3453.
4. D. A. Bernardis, D. J. Macaya, M. Nikolou, J. A. DeFranco, S. Takamatsu and G. G. Malliaras, *J. Mater. Chem.*, 2008, **18**, 116-120.
5. S. Khan, S. Ali, A. Khan, B. Wang and A. Bermak, *IEEE Sens. J.*, 2021, **21**, 4167-4175.
6. S. Demuru, C.-H. Huang, K. Parvez, R. Worsley, G. Mattana, B. Piro, V. Noël, C. Casiraghi and D. Briand, *ACS Appl. Nano Mater.*, 2022, **5**, 1664-1673.
7. S. Y. Yang, F. Cicoira, R. Byrne, F. Benito-Lopez, D. Diamond, R. M. Owens and G. G. Malliaras, *Chem. Commun.*, 2010, **46**, 7972-7974.
8. J. Li, F. Madiyar, S. Ghate, K. S. Kumar and J. Thomas, *Nano Res.*, 2023, **16**, 3201-3206.
9. C. Liao, M. Zhang, L. Niu, Z. Zheng and F. Yan, *J. Mater. Chem. B*, 2013, **1**, 3820-3829.
10. L. Zhang, L. Wang, S. He, C. Zhu, Z. Gong, Y. Zhang, J. Wang, L. Yu, K. Gao, X. Kang, Y. Song, G. Lu and H.-D. Yu, *ACS Appl. Mater. Interfaces*, 2023, **15**, 3224-3234.
11. L. Wang, Q. Sun, L. Zhang, J. Wang, G. Ren, L. Yu, K. Wang, Y. Zhu, G. Lu and H.-D. Yu, *Macromol. Rapid Commun.*, 2022, **43**, 2200212.
12. H. Tang, F. Yan, P. Lin, J. Xu and H. L. W. Chan, *Adv. Funct. Mater.*, 2011, **21**, 2264-2272.
